# Supplementary material for: Causal Effects of Circulating Lipid Traits on Epithelial Ovarian Cancer: A Two-Sample Mendelian Randomization Study
Source: MDPI journal article supplement (doi:10.3390/metabo12121175), 2022-11-25
Supplement: s1 [file s1]

**Supplemental materials**

**Causal Effects of Circulating Lipid Traits on Epithelial Ovarian**

**Cancer: A Two-Sample Mendelian Randomization Study**

**Contents**

Supplemental Table S1. Associations of genetically predicted apolipoprotein A1 (APOA1) with EOC risks in MR analyses.....2

Supplemental Table S2. Associations of genetically predicted apolipoprotein B (APOB) with EOC risks in MR analyses.....6

Supplemental Table S3. Associations of genetically predicted low-density lipoprotein cholesterol (LDL) with EOC risks in MR analyses.....10

**Supplemental Table S1.** Associations of genetically predicted apolipoprotein A1 (APOA1) with EOC risks in MR analyses

| Main outcome    | Method                                   | No. of SNPs | OR (95% CI)     | P for association | P for heterogeneity test | P for MR-Egger intercept | P for MR-PRESSO Global test |
|-----------------|------------------------------------------|-------------|-----------------|-------------------|--------------------------|--------------------------|-----------------------------|
| All EOC         | IVW                                      | 263         | 1.02(0.95-1.11) | 0.562             | <1 x10 <sup>-3</sup>     | 0.824                    |                             |
|                 | MR Egger                                 | 263         | 1.01(0.89-1.15) | 0.851             | <1 x10 <sup>-3</sup>     |                          |                             |
|                 | Weighted median                          | 263         | 0.97(0.87-1.10) | 0.666             |                          |                          |                             |
|                 | MR-PRESSO (outlier corrected, 1 outlier) | 262         | 1.01(1.01-1.02) | 0.722             |                          |                          | <1 x10 <sup>-4</sup>        |
| Clear cell OC   | IVW                                      | 263         | 1.17(0.93-1.48) | 0.176             | 0.002                    | 0.102                    |                             |
|                 | MR Egger                                 | 263         | 0.92(0.64-1.33) | 0.662             | 0.002                    |                          |                             |
|                 | Weighted median                          | 263         | 1.07(0.76-1.52) | 0.692             |                          |                          |                             |
|                 | MR-PRESSO (raw, 0 outliers)              | 263         | 1.17(1.15-1.18) | 0.189             |                          |                          | 0.001                       |
| Endometrioid OC | IVW                                      | 263         | 0.96(0.82-1.13) | 0.635             | 0.061                    | 0.722                    |                             |
|                 | MR Egger                                 | 263         | 1.00(0.78-1.28) | 0.987             | 0.057                    |                          |                             |
|                 | Weighted median                          | 263         | 1.03(0.82-1.30) | 0.799             |                          |                          |                             |
|                 | MR-PRESSO (raw, 0 outliers)              | 263         | 0.95(0.94-0.96) | 0.539             |                          |                          | 0.051                       |
| LMPOC           | IVW                                      | 263         | 0.87(0.75-1.01) | 0.066             | 0.245                    | 1.000                    |                             |

|         |                                          |     |                 |       |          |          |
|---------|------------------------------------------|-----|-----------------|-------|----------|----------|
|         | MR Egger                                 | 263 | 0.87(0.69-1.10) | 0.251 | 0.231    |          |
|         | Weighted median                          | 263 | 0.81(0.64-1.03) | 0.080 |          |          |
|         | MR-PRESSO (raw, 0 outliers)              | 263 | 0.86(0.86-0.87) | 0.053 |          | 0.239    |
| HGLGSOC | IVW                                      | 263 | 1.03(0.95-1.13) | 0.474 | 0.001    | 0.879    |
|         | MR Egger                                 | 263 | 1.02(0.89-1.18) | 0.744 | 0.001    |          |
|         | Weighted median                          | 263 | 1.00(0.87-1.15) | 0.990 |          |          |
|         | MR-PRESSO (outlier corrected, 1 outlier) | 262 | 1.02(1.02-1.02) | 0.641 |          | 0.002    |
| HGSOC   | IVW                                      | 263 | 1.04(0.95-1.15) | 0.362 | <1 x10-3 | 0.888    |
|         | MR Egger                                 | 263 | 1.04(0.89-1.20) | 0.647 | <1 x10-3 |          |
|         | Weighted median                          | 263 | 0.99(0.86-1.14) | 0.902 |          |          |
|         | MR-PRESSO (outlier corrected, 1 outlier) | 262 | 1.03(1.03-1.04) | 0.491 |          | <1 x10-3 |
| LGSOC   | IVW                                      | 263 | 0.84(0.66-1.08) | 0.180 | 0.384    | 0.834    |
|         | MR Egger                                 | 263 | 0.82(0.55-1.21) | 0.319 | 0.368    |          |
|         | Weighted median                          | 263 | 0.86(0.59-1.26) | 0.446 |          |          |
|         | MR-PRESSO (raw, 0 outliers)              | 263 | 0.84(0.82-0.85) | 0.155 |          | 0.348    |

|                                                    |                             |     |                 |       |       |       |
|----------------------------------------------------|-----------------------------|-----|-----------------|-------|-------|-------|
| LGLMSOC                                            | IVW                         | 263 | 0.84(0.73-0.98) | 0.022 | 0.464 | 0.559 |
|                                                    | MR Egger                    | 263 | 0.80(0.63-1.01) | 0.061 | 0.453 |       |
|                                                    | Weighted median             | 263 | 0.89(0.70-1.11) | 0.296 |       |       |
|                                                    | MR-PRESSO (raw, 0 outliers) | 263 | 0.83(0.82-0.84) | 0.014 |       | 0.361 |
| LMSOC                                              | IVW                         | 263 | 0.84(0.71-1.01) | 0.059 | 0.648 | 0.642 |
|                                                    | MR Egger                    | 263 | 0.80(0.60-1.06) | 0.124 | 0.635 |       |
|                                                    | Weighted median             | 263 | 0.90(0.68-1.20) | 0.478 |       |       |
|                                                    | MR-PRESSO (raw, 0 outliers) | 263 | 0.83(0.82-0.84) | 0.034 |       | 0.589 |
| MOC: invasive<br>and low<br>malignant<br>potential | IVW                         | 263 | 1.04(0.88-1.22) | 0.640 | 0.043 | 0.117 |
|                                                    | MR Egger                    | 263 | 1.22(0.94-1.59) | 0.130 | 0.050 |       |
|                                                    | Weighted median             | 263 | 1.15(0.88-1.51) | 0.296 |       |       |
|                                                    | MR-PRESSO (raw, 0 outliers) | 263 | 1.06(1.05-1.07) | 0.480 |       | 0.042 |
| Invasive MOC                                       | IVW                         | 263 | 1.15(0.93-1.42) | 0.185 | 0.193 | 0.078 |
|                                                    | MR Egger                    | 263 | 1.45(1.04-2.03) | 0.028 | 0.221 |       |
|                                                    | Weighted median             | 263 | 1.23(0.86-1.74) | 0.258 |       |       |

|       |                             |     |                 |       |       |       |
|-------|-----------------------------|-----|-----------------|-------|-------|-------|
|       | MR-PRESSO (raw, 0 outliers) | 263 | 1.18(1.17-1.20) | 0.113 |       | 0.196 |
|       | IVW                         | 263 | 0.91(0.72-1.14) | 0.393 | 0.337 | 0.538 |
| LMMOC | MR Egger                    | 263 | 0.99(0.69-1.42) | 0.957 | 0.328 |       |
|       | Weighted median             | 263 | 1.03(0.70-1.52) | 0.887 |       |       |
|       | MR-PRESSO (raw, 0 outliers) | 263 | 0.92(0.90-0.93) | 0.445 |       | 0.354 |

Abbreviations: APOA1, apolipoprotein A1; MR, mendelian randomization; IVW, inverse-variance weighted; OR, odds ratio; CI, confidence interval; SNP, single-nucleotide polymorphism; OC, ovarian cancer; EOC, epithelial ovarian cancer; SOC, serous ovarian cancer; MOC, mucinous ovarian cancer; LMPOC, low malignant potential ovarian cancer; HGLGSOC, high-grade and low-grade serous ovarian cancer; HGSOC, high-grade serous ovarian cancer; LGSOC, low-grade serous ovarian cancer; LGLMSOC, serous ovarian cancer: low-grade and low malignant potential; LMSOC, serous ovarian cancer: low malignant potential; LMMOC, low malignant potential mucinous ovarian cancer.

**Supplemental Table S2.** Associations of genetically predicted apolipoprotein B (APOB) with EOC risks in MR analyses.

| Main outcome    | Method                      | No. of SNPs | OR (95% CI)     | P for association | P for heterogeneity test | P for MR-Egger intercept | P for MR-PRESSO Global test |
|-----------------|-----------------------------|-------------|-----------------|-------------------|--------------------------|--------------------------|-----------------------------|
| All EOC         | IVW                         | 176         | 1.03(0.95-1.11) | 0.461             | 0.001                    | 0.001                    |                             |
|                 | MR Egger                    | 176         | 1.00(0.90-1.11) | 0.959             | 0.001                    |                          |                             |
|                 | Weighted median             | 176         | 1.04(0.93-1.15) | 0.512             |                          |                          |                             |
|                 | MR-PRESSO (raw, 0 outliers) | 176         | 1.03(1.02-1.04) | 0.436             |                          |                          | 0.001                       |
| Clear cell OC   | IVW                         | 176         | 1.01(0.82-1.25) | 0.895             | 0.173                    | 0.836                    |                             |
|                 | MR Egger                    | 176         | 0.99(0.75-1.32) | 0.965             | 0.161                    |                          |                             |
|                 | Weighted median             | 176         | 1.15(0.84-1.57) | 0.395             |                          |                          |                             |
|                 | MR-PRESSO (raw, 0 outliers) | 176         | 1.02(1.00-1.04) | 0.856             |                          |                          | 0.170                       |
| Endometrioid OC | IVW                         | 176         | 1.06(0.90-1.24) | 0.516             | 0.002                    | 0.734                    |                             |
|                 | MR Egger                    | 176         | 1.03(0.82-1.28) | 0.805             | 0.001                    |                          |                             |
|                 | Weighted median             | 176         | 0.95(0.74-1.21) | 0.660             |                          |                          |                             |
|                 | MR-PRESSO (raw, 0 outliers) | 176         | 1.05(1.04-1.07) | 0.528             |                          |                          | 0.002                       |
| LMPOC           | IVW                         | 176         | 0.92(0.80-1.07) | 0.271             | 0.262                    | 0.502                    |                             |

|         |                             |     |                 |       |       |       |
|---------|-----------------------------|-----|-----------------|-------|-------|-------|
|         | MR Egger                    | 176 | 0.88(0.72-1.07) | 0.208 | 0.252 |       |
|         | Weighted median             | 176 | 0.94(0.76-1.16) | 0.549 |       |       |
|         | MR-PRESSO (raw, 0 outliers) | 176 | 0.92(0.91-0.94) | 0.286 |       | 0.277 |
| HGLGSOC | IVW                         | 176 | 1.01(0.93-1.10) | 0.773 | 0.006 | 0.279 |
|         | MR Egger                    | 176 | 0.97(0.86-1.09) | 0.601 | 0.006 |       |
|         | Weighted median             | 176 | 1.00(0.89-1.13) | 0.980 |       |       |
|         | MR-PRESSO (raw, 0 outliers) | 176 | 1.01(1.01-1.02) | 0.757 |       | 0.007 |
| HGSOC   | IVW                         | 176 | 1.01(0.93-1.11) | 0.785 | 0.004 | 0.330 |
|         | MR Egger                    | 176 | 0.97(0.86-1.10) | 0.644 | 0.004 |       |
|         | Weighted median             | 176 | 1.04(0.92-1.17) | 0.558 |       |       |
|         | MR-PRESSO (raw, 0 outliers) | 176 | 1.01(1.01-1.02) | 0.771 |       | 0.006 |
| LGSOC   | IVW                         | 176 | 1.08(0.84-1.38) | 0.558 | 0.096 | 0.738 |
|         | MR Egger                    | 176 | 1.04(0.74-1.45) | 0.836 | 0.088 |       |
|         | Weighted median             | 176 | 0.98(0.67-1.43) | 0.929 |       |       |
|         | MR-PRESSO (raw, 0 outliers) | 176 | 1.08(1.06-1.10) | 0.545 |       | 0.109 |

|                                                    |                             |     |                 |       |       |       |
|----------------------------------------------------|-----------------------------|-----|-----------------|-------|-------|-------|
| LGLMSOC                                            | IVW                         | 176 | 1.03(0.89-1.19) | 0.683 | 0.286 | 0.199 |
|                                                    | MR Egger                    | 176 | 0.94(0.78-1.15) | 0.570 | 0.299 |       |
|                                                    | Weighted median             | 176 | 0.95(0.75-1.19) | 0.640 |       |       |
|                                                    | MR-PRESSO (raw, 0 outliers) | 176 | 1.03(1.02-1.04) | 0.687 |       | 0.319 |
| LMSOC                                              | IVW                         | 176 | 1.01(0.85-1.20) | 0.881 | 0.838 | 0.284 |
|                                                    | MR Egger                    | 176 | 0.93(0.73-1.17) | 0.537 | 0.841 |       |
|                                                    | Weighted median             | 176 | 0.98(0.75-1.28) | 0.888 |       |       |
|                                                    | MR-PRESSO (raw, 0 outliers) | 176 | 1.01(1.00-1.02) | 0.892 |       | 0.857 |
| MOC: invasive<br>and low<br>malignant<br>potential | IVW                         | 176 | 0.95(0.80-1.12) | 0.530 | 0.021 | 0.307 |
|                                                    | MR Egger                    | 176 | 1.03(0.82-1.29) | 0.814 | 0.021 |       |
|                                                    | Weighted median             | 176 | 1.08(0.85-1.36) | 0.545 |       |       |
|                                                    | MR-PRESSO (raw, 0 outliers) | 176 | 0.95(0.94-0.97) | 0.587 |       | 0.015 |
| Invasive MOC                                       | IVW                         | 176 | 1.09(0.87-1.36) | 0.447 | 0.008 | 0.230 |
|                                                    | MR Egger                    | 176 | 1.24(0.91-1.68) | 0.170 | 0.009 |       |
|                                                    | Weighted median             | 176 | 1.25(0.89-1.75) | 0.191 |       |       |



|       |                                          |     |                 |       |       |       |
|-------|------------------------------------------|-----|-----------------|-------|-------|-------|
|       | MR-PRESSO (raw, 0 outliers)              | 176 | 1.09(1.07-1.11) | 0.431 |       | 0.009 |
|       | IVW                                      | 176 | 0.78(0.61-0.99) | 0.038 | 0.041 | 0.823 |
|       | MR Egger                                 | 176 | 0.80(0.58-1.10) | 0.172 | 0.037 |       |
| LMMOC | Weighted median                          | 176 | 0.90(0.63-1.29) | 0.570 |       |       |
|       | MR-PRESSO (outlier corrected, 1 outlier) | 175 | 0.77(0.76-0.79) | 0.030 |       | 0.026 |

Abbreviations: APOB, apolipoprotein B; MR, mendelian randomization; IVW, inverse-variance weighted; OR, odds ratio; CI, confidence interval; SNP, single-nucleotide polymorphism; OC, ovarian cancer; EOC, epithelial ovarian cancer; SOC, serous ovarian cancer; MOC, mucinous ovarian cancer; LMPOC, low malignant potential ovarian cancer; HGLGSOC, high-grade and low-grade serous ovarian cancer; HGSOC, high-grade serous ovarian cancer; LGSOC, low-grade serous ovarian cancer; LGLMSOC, serous ovarian cancer: low-grade and low malignant potential; LMSOC, serous ovarian cancer: low malignant potential; LMMOC, low malignant potential mucinous ovarian cancer.

**Supplemental Table S3.** Associations of genetically predicted low-density lipoprotein cholesterol (LDL) with EOC risks in MR analyses.

| Main outcome    | Method                      | No. of SNPs | OR (95% CI)     | P for association | P for heterogeneity test | P for MR-Egger intercept | P for MR-PRESSO Global test |
|-----------------|-----------------------------|-------------|-----------------|-------------------|--------------------------|--------------------------|-----------------------------|
| All EOC         | IVW                         | 158         | 1.04(0.95-1.14) | 0.433             | <1 x10-3                 | 0.553                    |                             |
|                 | MR Egger                    | 158         | 1.01(0.88-1.15) | 0.927             | <1 x10-3                 |                          |                             |
|                 | Weighted median             | 158         | 1.03(0.91-1.16) | 0.617             |                          |                          |                             |
|                 | MR-PRESSO (raw, 0 outliers) | 158         | 1.04(1.03-1.05) | 0.434             |                          |                          | <1 x10-3                    |
| Clear cell OC   | IVW                         | 158         | 0.99(0.79-1.26) | 0.963             | 0.760                    | 0.673                    |                             |
|                 | MR Egger                    | 158         | 0.94(0.67-1.33) | 0.732             | 0.746                    |                          |                             |
|                 | Weighted median             | 158         | 1.07(0.74-1.57) | 0.707             |                          |                          |                             |
|                 | MR-PRESSO (raw, 0 outliers) | 158         | 0.99(0.98-1.01) | 0.961             |                          |                          | 0.772                       |
| Endometrioid OC | IVW                         | 158         | 1.12(0.92-1.36) | 0.247             | 0.001                    | 0.323                    |                             |
|                 | MR Egger                    | 158         | 1.01(0.76-1.35) | 0.956             | 0.001                    |                          |                             |
|                 | Weighted median             | 158         | 1.03(0.79-1.35) | 0.803             |                          |                          |                             |
|                 | MR-PRESSO (raw, 0 outliers) | 158         | 1.12(1.10-1.14) | 0.249             |                          |                          | 0.001                       |

|         |                             |     |                 |       |       |       |
|---------|-----------------------------|-----|-----------------|-------|-------|-------|
| LMPOC   | IVW                         | 158 | 0.90(0.77-1.07) | 0.230 | 0.599 | 0.918 |
|         | MR Egger                    | 158 | 0.90(0.71-1.14) | 0.375 | 0.577 |       |
|         | Weighted median             | 158 | 0.91(0.71-1.17) | 0.471 |       |       |
|         | MR-PRESSO (raw, 0 outliers) | 158 | 0.90(0.89-0.92) | 0.224 |       | 0.607 |
| HGLGSOC | IVW                         | 158 | 1.03(0.93-1.13) | 0.632 | 0.006 | 0.357 |
|         | MR Egger                    | 158 | 0.97(0.84-1.13) | 0.723 | 0.006 |       |
|         | Weighted median             | 158 | 1.00(0.87-1.14) | 0.945 |       |       |
|         | MR-PRESSO (raw, 0 outliers) | 158 | 1.03(1.02-1.03) | 0.633 |       | 0.009 |
| HGSOC   | IVW                         | 158 | 1.03(0.93-1.15) | 0.539 | 0.002 | 0.336 |
|         | MR Egger                    | 158 | 0.98(0.83-1.14) | 0.769 | 0.002 |       |
|         | Weighted median             | 158 | 1.03(0.90-1.19) | 0.637 |       |       |
|         | MR-PRESSO (raw, 0 outliers) | 158 | 1.03(1.03-1.04) | 0.540 |       | 0.002 |
| LGSOC   | IVW                         | 158 | 0.96(0.72-1.28) | 0.778 | 0.261 | 0.864 |
|         | MR Egger                    | 158 | 0.99(0.65-1.50) | 0.948 | 0.243 |       |
|         | Weighted median             | 158 | 0.85(0.55-1.31) | 0.453 |       |       |

|                                                    |                             |     |                 |       |       |       |
|----------------------------------------------------|-----------------------------|-----|-----------------|-------|-------|-------|
|                                                    | MR-PRESSO (raw, 0 outliers) | 158 | 0.96(0.94-0.98) | 0.778 |       | 0.273 |
| LGLMSOC                                            | IVW                         | 158 | 1.00(0.84-1.18) | 0.961 | 0.216 | 0.714 |
|                                                    | MR Egger                    | 158 | 0.96(0.74-1.24) | 0.762 | 0.202 |       |
|                                                    | Weighted median             | 158 | 0.93(0.72-1.21) | 0.604 |       |       |
|                                                    | MR-PRESSO (raw, 0 outliers) | 158 | 1.00(0.98-1.01) | 0.961 |       | 0.232 |
| LMSOC                                              | IVW                         | 158 | 1.02(0.83-1.24) | 0.875 | 0.810 | 0.531 |
|                                                    | MR Egger                    | 158 | 0.95(0.70-1.27) | 0.723 | 0.800 |       |
|                                                    | Weighted median             | 158 | 0.90(0.65-1.24) | 0.512 |       |       |
|                                                    | MR-PRESSO (raw, 0 outliers) | 158 | 1.02(1.00-1.03) | 0.869 |       | 0.815 |
| MOC: invasive<br>and low<br>malignant<br>potential | IVW                         | 158 | 0.91(0.75-1.11) | 0.341 | 0.015 | 0.192 |
|                                                    | MR Egger                    | 158 | 1.05(0.79-1.40) | 0.751 | 0.017 |       |
|                                                    | Weighted median             | 158 | 1.09(0.82-1.44) | 0.565 |       |       |
|                                                    | MR-PRESSO (raw, 0 outliers) | 158 | 0.91(0.90-0.92) | 0.342 |       | 0.016 |
| Invasive MOC                                       | IVW                         | 158 | 1.05(0.81-1.36) | 0.696 | 0.028 | 0.174 |
|                                                    | MR Egger                    | 158 | 1.28(0.88-1.87) | 0.205 | 0.032 |       |

|       |                             |     |                 |       |       |       |
|-------|-----------------------------|-----|-----------------|-------|-------|-------|
|       | Weighted median             | 158 | 1.20(0.81-1.77) | 0.368 |       |       |
|       | MR-PRESSO (raw, 0 outliers) | 158 | 1.05(1.03-1.07) | 0.697 |       | 0.028 |
| LMMOC | IVW                         | 158 | 0.74(0.56-0.97) | 0.030 | 0.054 | 0.590 |
|       | MR Egger                    | 158 | 0.80(0.53-1.20) | 0.282 | 0.050 |       |
|       | Weighted median             | 158 | 0.66(0.43-1.01) | 0.053 |       |       |
|       | MR-PRESSO (raw, 0 outliers) | 158 | 0.74(0.72-0.75) | 0.031 |       | 0.050 |

Abbreviations: LDL, low-density lipoprotein cholesterol; MR, mendelian randomization; IVW, inverse-variance weighted; OR, odds ratio; CI, confidence interval; SNP, single-nucleotide polymorphism; OC, ovarian cancer; EOC, epithelial ovarian cancer; SOC, serous ovarian cancer; MOC, mucinous ovarian cancer; LMPOC, low malignant potential ovarian cancer; HGLGSOC, high-grade and low-grade serous ovarian cancer; HGSOC, high-grade serous ovarian cancer; LGSOC, low-grade serous ovarian cancer; LGLMSOC, serous ovarian cancer: low-grade and low malignant potential; LMSOC, serous ovarian cancer: low malignant potential; LMMOC, low malignant potential mucinous ovarian cancer.
